# Supplementary material for: Invasions of European Tribes During Severe Cold Winters of the Past Three Millennia
Source: Research Square preprint supplement (doi:10.21203/rs.3.rs-1463772/v1), 2022-03-28
Supplement: Supplementary file 1 [file 427c30623d68187a3e7293fd.xlsx]

## Sheet: Data
d18O Data of ZL01
Depth (mm)	Age (yr BP 1950)	Error +	Error -	d18O (‰ VPDB)
0	9.90234	27.0183	-6.32309	-6.70122
0.2	17.625	33.4124	2.90079	-6.7333
0.4	25.4232	39.8487	12.1765	-6.70744
0.6	33.2436	46.3287	21.3801	-6.7201
0.8	41.0323	52.8534	30.3877	-6.64446
1	48.736	59.4241	39.0753	-6.59318
1.1	52.5391	62.7272	43.2604	-6.66062
1.2	56.3009	66.0422	47.319	-6.73562
1.3	60.0147	69.3694	51.2357	-6.75509
1.4	63.6736	72.7089	54.9949	-6.77093
1.5	67.2711	76.0608	58.5812	-6.80181
1.6	70.8005	79.4254	61.979	-6.8114
1.7	74.2549	82.8027	65.173	-6.80888
1.8	77.6279	86.193	68.1475	-6.81186
1.9	80.9125	89.5964	70.8871	-6.77577
2	84.1022	93.013	73.3763	-6.87516
2.1	87.1941	96.4437	75.6083	-6.85148
2.2	90.2001	99.8921	77.6104	-6.92397
2.3	93.1362	103.362	79.4187	-6.8869
2.4	96.0182	106.859	81.0693	-6.93917
2.5	98.862	110.387	82.5982	-6.90742
2.6	101.683	113.949	84.0416	-6.83416
2.7	104.498	117.55	85.4354	-6.93458
2.8	107.323	121.196	86.8157	-6.90811
2.9	110.172	124.889	88.2185	-6.88406
3	113.063	128.634	89.68	-6.85274
3.1	116.01	132.435	91.2362	-6.83519
3.2	119.03	136.297	92.9231	-6.78542
3.3	122.139	140.225	94.7768	-6.71616
3.4	125.353	144.222	96.8333	-6.83964
3.5	128.686	148.292	99.1287	-6.77281
3.6	132.156	152.441	101.699	-6.72798
3.7	135.778	156.671	104.58	-6.65717
3.8	139.568	160.989	107.809	-6.64327
3.9	143.542	165.397	111.421	-6.8766
4	147.715	169.9	115.451	-6.73495
4.113	152.684	175.109	120.538	-6.77909
4.225	157.865	180.397	126.102	-6.80535
4.338	163.333	185.862	132.189	-6.76763
4.45	168.974	191.408	138.64	-6.76007
4.563	174.874	197.134	145.518	-6.71276
4.675	180.912	202.941	152.649	-6.76996
4.788	187.178	208.935	160.107	-6.57979
4.9	193.546	215.009	167.71	-6.6993
5	199.35	220.545	174.633	-6.66144
5.15	208.24	229.054	185.174	-6.69231
5.3	217.317	237.809	195.79	-6.7469
5.45	226.541	246.812	206.36	-6.65456
5.6	235.873	256.068	216.76	-6.70175
5.75	245.275	265.579	226.865	-6.74498
5.9	254.707	275.347	236.553	-6.75661
6	260.993	282.005	242.718	-6.7755
6.1	267.268	288.78	248.617	-6.71578
6.2	273.543	295.686	254.268	-6.71757
6.3	279.834	302.733	259.698	-6.79455
6.4	286.157	309.935	264.937	-6.8611
6.5	292.527	317.304	270.013	-6.78827
6.6	298.959	324.854	274.955	-6.94196
6.7	305.47	332.596	279.791	-6.86133
6.8	312.075	340.543	284.549	-6.99562
6.9	318.789	348.708	289.259	-6.86784
7	325.628	357.104	293.949	-6.93877
7.1	332.609	365.743	298.647	-6.90094
7.2	339.745	374.637	303.382	-6.92936
7.3	347.054	383.801	308.183	-6.93549
7.4	354.55	393.245	313.077	-6.9765
7.5	362.249	402.984	318.095	-7.05592
7.6	370.167	413.028	323.264	-6.98362
7.7	378.32	423.392	328.612	-7.19828
7.8	386.723	434.088	334.169	-7.03656
7.9	395.391	445.128	339.963	-7.06389
8	404.34	456.525	346.022	-7.1383
8.129	416.299	471.739	354.254	-7.23014
8.257	428.525	487.262	362.826	-7.09856
8.386	441.081	503.153	371.795	-7.12766
8.514	453.646	518.984	380.942	-7.0961
8.643	466.287	534.82	390.33	-6.94006
8.771	478.681	550.233	399.737	-6.77525
8.9	490.893	565.281	409.229	-6.7723
9	500.084	571.23	416.545	-6.72297
9.113	510.099	577.269	424.717	-6.45901
9.225	519.554	582.885	432.666	-6.53288
9.338	528.531	588.119	440.48	-6.53393
9.45	536.786	592.815	447.969	-6.7315
9.563	544.38	596.996	455.214	-6.71942
9.675	548.212	600.528	462.033	-6.60439
9.788	551.145	603.412	468.495	-6.55762
9.9	553.56	605.537	474.433	-6.51605
10	555.268	606.767	479.299	-6.59226
10.113	556.665	607.368	484.272	-6.72655
10.225	557.532	607.368	488.684	-6.81086
10.338	557.939	607.368	492.66	-6.76162
10.45	557.954	607.368	496.179	-6.61329
10.563	557.969	607.368	499.353	-6.6393
10.675	557.984	607.368	502.172	-6.58661
10.788	558	607.368	504.737	-6.57752
10.9	558.015	607.368	507.049	-6.42862
11	558.028	607.368	508.96	-6.36915
11.129	558.046	607.368	511.267	-6.37414
11.257	558.063	607.368	513.446	-6.39105
11.386	558.081	607.368	515.605	-6.3749
11.514	558.098	607.368	517.78	-6.78996
11.643	558.116	607.368	520.08	-6.31217
11.771	558.133	607.368	522.539	-6.27183
11.9	558.151	607.368	525.268	-6.40416
12	558.164	607.368	527.603	-6.34107
12.1	558.178	607.368	530.16	-6.30888
12.2	558.711	607.368	532.932	-6.38852
12.3	559.52	607.46	535.904	-6.38131
12.4	560.583	607.943	539.063	-6.333
12.5	561.88	608.786	542.394	-6.34632
12.6	563.392	609.959	545.884	-6.47884
12.7	565.099	611.431	549.518	-6.37363
12.8	566.98	613.171	553.283	-6.43845
12.9	569.016	615.15	557.163	-6.41681
13	571.826	617.336	561.145	-6.61123
13.113	577.005	620.018	565.75	-6.5043
13.225	582.371	622.857	570.405	-6.40325
13.338	587.961	625.859	575.172	-6.5482
13.45	593.62	628.927	579.947	-6.57745
13.563	599.391	632.074	584.796	-6.68488
13.675	605.117	635.2	589.612	-6.69871
13.788	610.842	638.317	594.461	-6.70186
13.9	616.408	641.327	599.237	-6.65056
14	621.241	643.913	603.461	-6.56372
14.1	625.911	646.377	607.634	-6.66077
14.2	630.421	648.722	611.756	-6.59033
14.3	634.781	653.139	615.832	-6.51961
14.4	639.003	657.399	619.864	-6.64627
14.5	643.097	661.467	623.856	-6.5622
14.6	647.074	665.361	627.811	-6.53817
14.7	650.944	669.096	631.733	-6.55743
14.8	654.718	672.689	635.625	-6.56247
14.9	658.408	676.155	639.489	-6.50358
15	662.022	679.512	643.331	-6.52945
15.1	665.574	682.774	647.152	-6.51948
15.2	669.072	685.96	650.957	-6.55131
15.3	672.529	689.083	654.749	-6.43453
15.4	675.954	692.161	658.53	-6.49035
15.5	679.358	695.21	662.305	-6.47534
15.6	682.752	698.247	666.077	-6.46848
15.7	686.147	701.286	669.849	-6.67134
15.8	689.554	704.344	673.625	-6.57028
15.9	692.982	707.439	677.407	-6.61972
16	696.444	710.585	681.2	-6.49013
16.1	699.947	713.795	685.005	-6.5989
16.2	703.491	717.069	688.824	-6.62989
16.3	707.074	720.403	692.654	-6.62475
16.4	710.691	723.793	696.495	-6.63105
16.5	714.341	727.234	700.347	-6.59104
16.6	718.021	730.723	704.207	-6.58254
16.7	721.728	734.256	708.077	-6.51438
16.8	725.46	737.828	711.954	-6.50174
16.9	729.212	741.435	715.837	-6.5103
17	732.984	745.074	719.727	-6.46818
17.1	736.771	748.74	723.622	-6.46373
17.2	740.571	752.429	727.521	-6.42981
17.3	744.382	756.137	731.424	-6.40901
17.4	748.2	759.861	735.329	-6.39877
17.5	752.023	763.595	739.236	-6.46222
17.6	755.848	767.337	743.144	-6.44992
17.7	759.672	771.082	747.052	-6.36578
17.8	763.493	774.825	750.959	-6.51145
17.9	767.307	778.563	754.864	-6.5403
18	771.113	782.292	758.767	-6.40732
18.1	774.906	786.009	762.667	-6.46382
18.2	778.689	789.712	766.564	-6.3943
18.3	782.461	793.402	770.457	-6.41863
18.4	786.223	797.078	774.348	-6.45384
18.5	789.976	800.742	778.236	-6.5266
18.6	793.721	804.392	782.121	-6.56454
18.7	797.458	808.028	786.004	-6.37724
18.8	801.187	811.652	789.885	-6.47365
18.9	804.91	815.262	793.763	-6.43381
19	808.627	818.859	797.64	-6.44745
19.1	812.339	822.442	801.515	-6.34532
19.2	816.046	826.013	805.388	-6.39063
19.3	819.75	829.57	809.26	-6.4789
19.4	823.45	833.114	813.13	-6.45223
19.5	827.148	836.644	817	-6.41638
19.6	830.845	840.162	820.868	-6.41444
19.7	834.54	843.666	824.735	-6.32086
19.8	838.234	847.156	828.602	-6.40573
19.9	841.929	850.634	832.468	-6.35272
20	845.625	854.098	836.334	-6.32392
20.1	849.322	857.55	840.199	-6.3734
20.2	853.021	860.994	844.064	-6.33691
20.3	856.722	864.435	847.929	-6.38636
20.4	860.425	867.878	851.795	-6.38405
20.5	864.131	871.329	855.66	-6.50457
20.6	867.838	874.792	859.525	-6.33551
20.7	871.549	878.273	863.391	-6.42601
20.8	875.262	881.777	867.257	-6.56745
20.9	878.979	885.309	871.123	-6.51495
21	882.698	888.875	874.989	-6.63677
21.15	888.284	894.297	880.79	-6.5391
21.3	893.878	899.824	886.593	-6.48272
21.45	899.481	905.472	892.397	-6.43984
21.6	905.093	911.259	898.202	-6.46167
21.75	910.715	917.203	904.01	-6.49417
21.9	916.348	923.321	909.821	-6.54325
22	920.11	927.505	913.696	-6.40676
22.1	923.877	931.776	917.572	-6.4468
22.2	927.648	936.127	921.448	-6.58695
22.3	931.424	940.545	925.323	-6.56608
22.4	935.204	945.019	929.195	-6.71649
22.5	938.988	949.538	933.063	-6.65143
22.6	942.775	954.091	936.926	-6.56958
22.7	946.565	958.666	940.782	-6.63827
22.8	950.357	963.251	944.63	-6.6049
22.9	954.151	967.836	948.469	-6.56339
23	957.947	972.409	952.298	-6.55695
23.129	962.846	978.273	957.219	-6.62429
23.257	967.708	984.028	962.08	-6.63352
23.386	972.609	989.741	966.953	-6.65518
23.514	977.471	995.299	971.761	-6.74064
23.643	982.37	1000.77	976.575	-6.7096
23.771	987.229	1006.03	981.319	-6.72239
23.9	992.123	1011.15	986.064	-6.71703
24	995.915	1014.98	989.715	-6.87089
24.1	999.704	1018.68	993.342	-6.8134
24.2	1003.49	1022.25	996.948	-6.74779
24.3	1007.27	1025.7	1000.54	-6.77704
24.4	1011.05	1029.05	1004.11	-6.75839
24.5	1014.82	1032.3	1007.68	-6.82148
24.6	1018.58	1035.47	1011.24	-6.73864
24.7	1022.33	1038.57	1014.79	-6.80879
24.8	1026.08	1041.6	1018.35	-6.82432
24.9	1029.82	1044.59	1021.92	-6.76326
25	1033.54	1047.53	1025.5	-6.7931
25.1	1037.26	1050.44	1029.09	-6.73129
25.2	1040.96	1053.34	1032.69	-6.77271
25.3	1044.65	1056.22	1036.32	-6.83043
25.4	1048.33	1059.11	1039.97	-6.93636
25.5	1051.99	1062.01	1043.66	-6.87853
25.6	1055.64	1064.93	1047.37	-6.88979
25.7	1059.26	1067.88	1051.12	-6.62515
25.8	1062.88	1070.88	1054.92	-6.86982
25.9	1066.47	1073.94	1058.75	-6.9284
26	1070.05	1077.06	1062.64	-6.8291
26.1	1073.6	1080.25	1066.57	-6.87094
26.3	1080.65	1086.86	1074.53	-6.75861
26.5	1087.64	1093.72	1082.49	-6.77007
26.7	1094.56	1100.8	1090.32	-6.75215
26.9	1101.42	1108.08	1097.88	-6.71194
27	1104.83	1111.78	1101.52	-6.53074
27.113	1108.67	1116.01	1105.48	-6.60757
27.225	1112.47	1120.24	1109.24	-6.53963
27.338	1116.28	1124.54	1112.84	-6.42194
27.45	1120.05	1128.83	1116.18	-6.49097
27.563	1123.84	1133.19	1119.3	-6.49929
27.675	1127.59	1137.52	1122.13	-6.56149
27.788	1131.36	1141.9	1124.69	-6.37883
27.9	1135.1	1146.25	1126.91	-6.4942
28	1138.42	1150.13	1128.6	-6.51024
28.1	1141.75	1154.01	1130.01	-6.46856
28.2	1145.06	1157.89	1131.17	-6.44767
28.3	1148.36	1161.76	1132.1	-6.43266
28.4	1151.64	1165.62	1132.83	-6.62784
28.5	1154.9	1169.47	1133.39	-6.33112
28.6	1158.13	1173.32	1133.82	-6.39211
28.7	1161.32	1177.16	1134.14	-6.26756
28.8	1164.48	1180.99	1134.38	-6.32909
28.9	1167.59	1184.81	1134.59	-6.46184
29	1170.66	1188.61	1134.77	-6.45118
29.1	1173.67	1192.41	1134.97	-6.41124
29.2	1176.62	1196.19	1135.22	-6.39635
29.3	1179.5	1199.96	1135.54	-6.4722
29.4	1182.32	1203.71	1135.97	-6.41147
29.5	1185.07	1207.45	1136.53	-6.48534
29.6	1187.74	1211.17	1137.26	-6.38489
29.7	1190.32	1214.88	1138.19	-6.49514
29.8	1192.81	1218.57	1139.35	-6.54106
29.9	1195.21	1222.23	1140.76	-6.49806
30	1197.52	1225.88	1142.46	-6.51224
30.1	1199.72	1229.51	1144.48	-6.46286
30.2	1201.83	1233.12	1146.79	-6.41418
30.3	1203.87	1236.69	1149.38	-6.36218
30.4	1205.84	1240.24	1152.24	-6.39875
30.5	1207.76	1243.74	1155.34	-6.40936
30.6	1209.65	1247.21	1158.67	-6.36208
30.7	1211.52	1250.63	1162.2	-6.36911
30.8	1213.38	1254	1165.92	-6.41774
30.9	1215.24	1257.32	1169.81	-6.4026
31	1217.13	1260.58	1173.85	-6.46902
31.1	1219.04	1263.78	1178.03	-6.37711
31.2	1221.01	1266.91	1182.31	-6.38308
31.3	1223.03	1269.97	1186.7	-6.55749
31.4	1225.13	1272.96	1191.16	-6.45328
31.5	1227.31	1275.87	1195.67	-6.50454
31.6	1229.6	1278.7	1200.23	-6.51238
31.7	1232	1281.44	1204.81	-6.56114
31.8	1234.53	1284.09	1209.39	-6.47951
31.9	1237.2	1286.65	1213.95	-6.53044
32	1240.02	1289.1	1218.48	-6.57575
32.1	1243.01	1291.46	1222.96	-6.57136
32.2	1246.16	1293.72	1227.38	-6.51202
32.3	1249.45	1295.9	1231.75	-6.48176
32.4	1252.88	1298.02	1236.07	-6.52731
32.5	1256.43	1300.08	1240.34	-6.4854
32.6	1260.09	1302.09	1244.56	-6.5314
32.7	1263.85	1304.07	1248.72	-6.32496
32.8	1267.7	1306.02	1252.84	-6.45136
32.9	1271.62	1307.97	1256.91	-6.45619
33	1275.61	1309.92	1260.93	-6.42163
33.113	1280.18	1312.13	1265.41	-6.37527
33.225	1284.76	1314.36	1269.79	-6.29204
33.338	1289.41	1316.65	1274.15	-6.26773
33.45	1294.04	1319	1278.41	-6.25602
33.563	1298.71	1321.44	1282.65	-6.26429
33.675	1303.32	1323.96	1286.8	-6.23646
33.788	1307.95	1326.62	1290.93	-6.14868
33.9	1312.48	1329.38	1294.96	-6.21841
34	1316.47	1331.98	1298.51	-6.19327
34.1	1320.39	1334.69	1302.03	-6.22355
34.2	1324.26	1337.53	1305.5	-6.19505
34.3	1328.08	1340.49	1308.94	-6.15674
34.4	1331.84	1343.55	1312.35	-6.20243
34.5	1335.56	1346.71	1315.73	-6.11041
34.6	1339.24	1349.97	1319.09	-6.15131
34.7	1342.87	1353.32	1322.44	-6.15819
34.8	1346.48	1356.75	1325.77	-6.35224
34.9	1350.06	1360.26	1329.1	-6.08024
35	1353.61	1363.83	1332.42	-6.15834
35.1	1357.15	1367.47	1335.75	-6.19195
35.2	1360.67	1371.16	1339.08	-6.12386
35.3	1364.18	1374.9	1342.42
35.4	1367.68	1378.69	1345.78	-6.1648
35.5	1371.19	1382.5	1349.15
35.6	1374.69	1386.35	1352.56	-6.25673
35.7	1378.2	1390.22	1355.99	-6.33098
35.8	1381.73	1394.11	1359.45	-6.30904
35.9	1385.27	1398.01	1362.95	-6.32545
36	1388.83	1401.91	1366.49	-6.27243
36.1	1392.42	1405.81	1370.08	-6.30064
36.2	1396.03	1409.7	1373.71	-6.29288
36.3	1399.66	1413.59	1377.38	-6.28529
36.4	1403.32	1417.48	1381.08	-6.27866
36.5	1407	1421.36	1384.81	-6.35439
36.6	1410.69	1425.24	1388.57	-6.26633
36.7	1414.41	1429.12	1392.35	-6.28359
36.8	1418.14	1432.99	1396.15	-6.23787
36.9	1421.9	1436.86	1399.95	-6.24473
37	1425.66	1440.74	1403.77	-6.23912
37.113	1429.94	1445.11	1408.09	-6.18664
37.225	1434.19	1449.44	1412.37	-6.21177
37.338	1438.5	1453.8	1416.68	-6.20227
37.45	1442.79	1458.13	1420.93	-6.25232
37.563	1447.12	1462.49	1425.21	-6.21112
37.675	1451.43	1466.81	1429.42	-6.25048
37.788	1455.79	1471.18	1433.64	-6.22502
37.9	1460.12	1475.5	1437.79	-6.21071
38	1463.99	1479.35	1441.45	-6.17118
38.1	1467.87	1483.21	1445.08	-6.11411
38.2	1471.75	1487.07	1448.66	-6.07975
38.3	1475.63	1490.93	1452.21	-6.13985
38.4	1479.52	1494.78	1455.72	-6.20932
38.5	1483.42	1498.64	1459.19	-6.30481
38.6	1487.32	1502.5	1462.61	-6.25694
38.7	1491.22	1506.37	1465.99	-6.34726
38.8	1495.13	1510.23	1469.34	-6.26824
39	1502.96	1517.97	1475.89	-6.25611
39.1	1506.89	1521.84	1479.11	-6.40744
39.2	1510.81	1525.72	1482.27	-6.563
39.3	1514.75	1529.6	1485.4	-6.50027
39.4	1518.68	1533.48	1488.48	-6.65677
39.5	1522.63	1537.37	1491.51	-6.68935
39.6	1526.57	1541.27	1494.5	-6.519
39.7	1530.52	1545.17	1497.44	-6.66818
39.8	1534.48	1549.07	1500.34	-6.72401
39.9	1538.44	1552.98	1503.19	-6.71334
40	1542.41	1556.9	1505.99	-6.52779
40.1	1546.38	1560.83	1508.74	-6.74934
40.2	1550.35	1564.76	1511.47	-6.68952
40.3	1554.33	1568.69	1514.17	-6.74666
40.4	1558.32	1572.63	1516.88	-6.81544
40.5	1562.3	1576.58	1519.6	-6.7612
40.6	1566.29	1580.53	1522.35	-6.72866
40.7	1570.29	1584.49	1525.14	-6.66682
40.8	1574.28	1588.45	1528	-6.71271
40.9	1578.28	1592.41	1530.93	-6.66513
41	1582.28	1596.38	1533.96	-6.64223
41.1	1586.28	1600.35	1537.1	-6.62446
41.2	1590.29	1604.32	1540.36
41.3	1594.29	1608.29	1543.76	-6.4611
41.4	1598.3	1612.26	1547.31	-6.54433
41.5	1602.31	1616.23	1551.04	-6.43087
41.6	1606.31	1620.21	1554.96	-6.37068
41.7	1610.32	1624.18	1559.07	-6.37538
41.8	1614.33	1628.16	1563.41	-6.34303
41.9	1618.34	1632.13	1567.98	-6.24754
42	1622.34	1636.1	1572.8	-6.39371
42.1	1626.35	1640.07	1577.88	-6.36083
42.2	1630.35	1644.04	1583.19	-6.35728
42.3	1634.35	1648	1588.72	-6.4141
42.4	1638.35	1651.97	1594.42	-6.41687
42.5	1642.35	1655.93	1600.28	-6.39559
42.6	1646.35	1659.89	1606.26	-6.38931
42.7	1650.35	1663.85	1612.34	-6.43947
42.8	1654.34	1667.81	1618.48	-6.39726
42.9	1658.33	1671.77	1624.66	-6.40744
43	1662.32	1675.73	1630.86	-6.44583
43.113	1666.83	1680.2	1637.83	-6.35746
43.225	1671.29	1684.64	1644.69	-6.41391
43.338	1675.79	1689.11	1651.5	-6.4328
43.45	1680.25	1693.54	1658.1	-6.33913
43.563	1684.74	1698.01	1664.59	-6.24677
43.675	1689.19	1702.45	1670.79	-6.39026
43.788	1693.68	1706.92	1676.78	-6.25691
43.9	1698.12	1711.35	1682.42	-6.32531
44	1702.09	1715.31	1687.16	-6.42131
44.113	1706.56	1719.79	1692.17	-6.35693
44.338	1715.46	1728.7	1701.13	-6.43558
44.45	1719.88	1733.14	1705.14	-6.40196
44.563	1724.34	1737.62	1708.92	-6.4264
44.675	1728.75	1742.06	1712.44	-6.40599
44.788	1733.2	1746.54	1715.79	-6.42435
44.9	1737.6	1750.98	1718.94	-6.34771
45	1741.53	1754.95	1721.64	-6.41621
45.113	1745.96	1759.43	1724.57	-6.38235
45.225	1750.34	1763.87	1727.4	-6.33935
45.338	1754.76	1768.35	1730.19	-6.34604
45.45	1759.14	1772.79	1732.94	-6.38341
45.563	1763.55	1777.27	1735.72	-6.39805
45.675	1767.91	1781.72	1738.51	-6.35257
45.788	1772.31	1786.2	1741.38	-6.377
45.9	1776.66	1790.64	1744.33	-6.40994
46	1780.53	1794.61	1747.07	-6.44877
46.1	1784.41	1798.57	1749.92	-6.43179
46.2	1788.27	1802.54	1752.88	-6.40643
46.3	1792.14	1806.5	1755.96	-6.40944
46.4	1796	1810.47	1759.15	-6.3844
46.5	1799.85	1814.44	1762.44	-6.34217
46.6	1803.71	1818.41	1765.83	-6.3471
46.7	1807.56	1822.38	1769.32	-6.39494
47	1819.12	1834.31	1780.34	-6.37627
47.1	1822.97	1838.29	1784.18	-6.38589
47.2	1826.82	1842.28	1788.09	-6.40556
47.3	1830.68	1846.27	1792.09	-6.39502
47.4	1834.53	1850.27	1796.15	-6.37944
47.5	1838.4	1854.27	1800.28	-6.45184
47.6	1842.26	1858.28	1804.47	-6.43104
47.7	1846.13	1862.29	1808.73	-6.32762
47.8	1850	1866.31	1813.03	-6.45299
47.9	1853.88	1870.34	1817.39	-6.46723
48	1857.77	1874.37	1821.8	-6.44587
48.129	1862.79	1879.58	1827.55	-6.44903
48.257	1867.79	1884.77	1833.32	-6.48729
48.386	1872.83	1890	1839.19	-6.5033
48.514	1877.85	1895.2	1845.06	-6.51742
48.643	1882.91	1900.44	1851.02	-6.4757
48.771	1887.94	1905.65	1856.96	-6.43357
48.9	1893.02	1910.9	1862.97	-6.50032
49	1896.96	1914.97	1867.64	-6.46612
49.1	1900.9	1919.04	1872.31	-6.47036
49.2	1904.85	1923.1	1876.98	-6.4304
49.3	1908.8	1927.17	1881.64	-6.46202
49.4	1912.75	1931.23	1886.3	-6.45049
49.5	1916.71	1935.28	1890.95	-6.34872
49.6	1920.67	1939.33	1895.58	-6.39016
49.7	1924.63	1943.37	1900.19	-6.2948
49.8	1928.59	1947.41	1904.78	-6.40118
49.9	1932.55	1951.44	1909.33
50	1936.52	1955.46	1913.86	-6.29984
50.1	1940.48	1959.46	1918.35	-6.26245
50.2	1944.45	1963.47	1922.81	-6.32665
50.3	1948.42	1967.46	1927.23	-6.24424
50.4	1952.39	1971.45	1931.62	-6.25653
50.5	1956.36	1975.43	1935.98	-6.28239
50.6	1960.34	1979.41	1940.32	-6.1021
50.7	1964.32	1983.39	1944.63	-6.24298
50.8	1968.31	1987.36	1948.92	-6.26755
50.9	1972.3	1991.34	1953.19	-6.28138
51.1	1980.3	1999.31	1961.66	-6.29337
51.2	1984.31	2003.29	1965.87	-6.21053
51.3	1988.32	2007.29	1970.07	-6.28185
51.4	1992.35	2011.29	1974.26	-6.25614
51.5	1996.38	2015.3	1978.44	-6.3216
51.6	2000.42	2019.32	1982.61	-6.32994
51.7	2004.48	2023.35	1986.77	-6.45468
51.8	2008.54	2027.39	1990.92	-6.28354
51.9	2012.61	2031.45	1995.08	-6.42723
52	2016.7	2035.52	1999.23	-6.50504
52.1	2020.8	2039.6	2003.39	-6.4217
52.2	2024.9	2043.7	2007.54	-6.52385
52.3	2029.02	2047.81	2011.69	-6.53145
52.4	2033.14	2051.92	2015.84	-6.51403
52.5	2037.27	2056.02	2019.99	-6.55659
52.6	2041.41	2060.12	2024.13	-6.49386
52.9	2053.83	2072.33	2036.52	-6.49942
53	2057.97	2076.36	2040.64	-6.61733
53.15	2064.17	2082.34	2046.79	-6.65194
53.3	2070.36	2088.24	2052.92	-6.65965
53.45	2076.54	2094.04	2059.02	-6.69817
53.6	2082.7	2099.73	2065.09	-6.72753
53.75	2088.84	2105.28	2071.12	-6.6537
53.9	2094.94	2110.69	2077.11	-6.68105
54	2098.99	2114.21	2081.08	-6.567
54.1	2103.03	2117.66	2085.03	-6.62746
54.2	2107.05	2121.05	2088.96	-6.50724
54.3	2111.06	2124.43	2092.88	-6.58376
54.4	2115.06	2127.8	2096.78	-6.54449
54.5	2119.05	2131.2	2100.66	-6.51896
54.6	2123.04	2134.65	2104.53	-6.48902
54.7	2127.04	2138.19	2108.39	-6.5365
54.8	2131.03	2141.82	2112.24	-6.50019
54.9	2135.03	2145.59	2116.08	-6.51979
55	2139.04	2149.51	2119.91	-6.53741
55.1	2143.06	2153.61	2123.73	-6.45779
55.2	2147.09	2157.92	2127.55	-6.49033
55.3	2151.14	2162.47	2131.36	-6.59511
55.4	2155.21	2167.27	2135.18	-6.56277
55.5	2159.3	2172.36	2138.99	-6.60617
55.6	2163.41	2177.76	2142.8	-6.57134
55.7	2167.55	2183.5	2146.61	-6.54917
55.8	2171.72	2189.6	2150.43	-6.60398
55.9	2175.93	2196.08	2154.25	-6.51814
56	2180.17	2202.98	2158.07	-6.55945
56.1	2184.45	2210.31	2161.91	-6.6032
56.2	2188.77	2218.03	2165.75	-6.56019
56.3	2193.13	2226.09	2169.59	-6.61594
56.4	2197.54	2234.44	2173.45	-6.71027
56.5	2201.99	2243.04	2177.31	-6.66116
56.6	2206.49	2251.84	2181.19	-6.70412
56.7	2211.04	2260.77	2185.07	-6.70178
56.8	2215.64	2269.81	2188.96	-6.76761
56.9	2220.29	2278.9	2192.87	-6.79966
57	2225	2287.98	2196.78	-6.70755
57.113	2230.39	2298.19	2201.22	-6.85459
57.225	2235.81	2308.17	2205.63	-6.88942
57.338	2241.35	2318.05	2210.09	-6.66535
57.45	2246.93	2327.56	2214.54	-6.84159
57.563	2252.64	2336.82	2219.03	-6.88171
57.675	2258.38	2345.58	2223.51	-6.86095
57.788	2264.27	2353.95	2228.04	-6.88457
57.9	2270.19	2361.69	2232.55	-6.8547
58	2275.56	2368.09	2236.59	-6.87549
58.129	2282.59	2375.57	2241.83	-6.91892
58.257	2289.67	2382.17	2247.07	-6.95439
58.386	2296.89	2388.06	2252.41	-6.91541
58.514	2304.12	2393.22	2257.78	-6.99206
58.643	2311.45	2397.79	2263.29	-7.00058
58.771	2318.75	2401.77	2268.86	-6.91093
58.9	2326.11	2405.28	2274.6	-6.90077
59	2331.8	2407.7	2279.14	-6.94662
59.1	2337.47	2409.89	2283.78	-6.90998
59.2	2343.11	2411.88	2288.52	-7.00225
59.3	2348.71	2413.7	2293.36	-6.76063
59.4	2354.26	2415.39	2298.33	-6.92343
59.5	2359.75	2416.97	2303.42	-6.71833
59.6	2365.18	2418.47	2308.64	-6.77068
59.7	2370.52	2419.93	2314	-6.86985
59.8	2375.78	2421.37	2319.5	-6.84827
59.9	2380.94	2422.84	2325.16	-6.7354
60	2385.99	2424.35	2330.99	-6.79497
60.1	2390.92	2425.93	2336.98	-6.75141
60.2	2395.75	2427.6	2343.12	-6.76854
60.3	2400.46	2429.36	2349.38	-6.76247
60.4	2405.06	2431.23	2355.74	-6.79148
60.5	2409.56	2433.2	2362.18	-6.74488
60.6	2413.95	2435.28	2368.67	-6.70824
60.7	2418.25	2437.49	2375.19	-6.64227
60.8	2422.45	2439.83	2381.71	-6.52591
60.9	2426.56	2442.3	2388.21	-6.60347
61	2430.57	2444.92	2394.68	-6.55461
61.1	2434.5	2447.69	2401.07	-6.44852
61.2	2438.34	2450.61	2407.37	-6.41088
61.3	2442.11	2453.71	2413.56	-6.4249
61.4	2445.79	2456.97	2419.62	-6.38587
61.5	2449.4	2460.42	2425.51	-6.41784
61.6	2452.93	2464.05	2431.21	-6.28679
61.7	2456.39	2467.88	2436.71	-6.50218
61.8	2459.79	2471.92	2441.97	-6.36521
61.9	2463.12	2476.16	2446.98	-6.46705
62	2466.4	2480.61	2451.71	-6.53607
62.113	2470.02	2485.91	2456.69	-6.41661
62.225	2473.55	2491.4	2461.28	-6.45588
62.338	2477.04	2497.12	2465.58	-6.48255
62.45	2480.43	2502.93	2469.55	-6.58842
62.563	2483.8	2508.89	2473.28	-6.53429
62.675	2487.08	2514.85	2476.75	-6.54872
62.788	2490.33	2520.85	2480.04	-6.53907
62.9	2493.51	2526.75	2483.12	-6.52483
63	2496.31	2531.94	2485.75	-6.58473
63.1	2499.07	2537.03	2488.28	-6.58507
63.2	2501.8	2541.97	2490.74	-6.59243
63.5	2509.83	2555.59	2497.86	-6.56424
63.6	2512.46	2559.63	2500.22	-6.58108
63.7	2515.07	2563.35	2502.61	-6.6021
63.8	2517.66	2566.74	2505.05	-6.61041
63.9	2520.23	2569.74	2507.56	-6.72166
64	2522.79	2572.34	2510.16	-6.67984
64.113	2525.67	2574.76	2513.22	-6.85692
64.225	2528.52	2576.65	2516.38	-6.87052
64.338	2531.38	2578.1	2519.66	-6.76792
64.45	2534.21	2579.06	2522.99	-6.891
64.563	2537.06	2579.41	2526.4	-6.92506
64.675	2539.88	2579.61	2529.82	-6.98275
64.788	2542.72	2579.68	2533.28	-6.89691
64.9	2545.53	2579.68	2536.7	-6.92591
65	2548.04	2579.68	2539.73	-7.00895
65.1	2550.56	2579.68	2542.72	-6.98915
65.2	2553.08	2579.68	2545.66	-6.7723
65.3	2555.6	2579.68	2548.53	-6.94591
65.4	2558.13	2579.68	2551.31	-7.01799
65.5	2560.66	2579.68	2554	-6.98049
65.6	2563.2	2579.68	2556.57	-6.99724
65.7	2565.76	2579.73	2559.01	-7.07731
65.8	2568.32	2579.88	2561.31	-6.99098
65.9	2570.89	2580.14	2563.45	-7.07417
66	2573.48	2580.67	2565.42	-7.0928
66.113	2576.42	2581.89	2567.43	-6.97974
66.225	2579.35	2583.44	2569.2	-6.95623
66.338	2582.32	2585.34	2570.81	-6.94286
66.45	2585.27	2587.5	2572.25	-6.94323
66.563	2588.26	2589.96	2573.58	-6.86562
66.675	2591.22	2592.64	2574.8	-6.88089
66.788	2594.21	2595.57	2575.97	-6.65097
66.9	2597.18	2598.65	2577.08	-6.93179
67	2599.83	2601.55	2578.06	-6.87135
67.1	2602.48	2604.55	2579.06	-6.82258
67.2	2605.11	2607.65	2580.09	-6.87328
67.3	2607.75	2610.83	2581.16	-6.92714
67.4	2610.37	2614.06	2582.31	-6.792
67.5	2612.98	2617.33	2583.55	-6.74409
67.6	2615.58	2620.62	2584.9	-6.70909
67.7	2618.17	2623.91	2586.39	-6.69627
67.8	2620.74	2627.19	2588.02	-6.65891
67.9	2623.29	2630.43	2589.82	-6.53637
68	2625.82	2633.61	2591.82	-6.59387
68.113	2628.66	2637.13	2594.32	-6.56314
68.225	2631.45	2640.53	2597.04	-6.55216
68.338	2634.24	2643.88	2600.03	-6.6542
68.45	2637	2647.13	2603.2	-6.64458
68.563	2639.77	2650.34	2606.59	-6.36736
68.675	2642.51	2653.47	2610.13	-6.54749
68.788	2645.28	2656.56	2613.86	-6.46607
68.9	2648.02	2659.58	2617.7	-6.44912
69	2650.47	2662.25	2621.23	-6.44084
69.129	2653.65	2665.64	2625.91	-6.36554
69.257	2656.82	2668.97	2630.66	-6.30858
69.386	2660.05	2672.3	2635.54	-6.33578
69.514	2663.28	2675.58	2640.44	-6.30563
69.643	2666.57	2678.88	2645.41	-6.16687
69.771	2669.89	2682.15	2650.35	-6.16613
69.9	2673.28	2685.45	2655.31	-6.20637
70	2675.95	2688.03	2659.12	-6.27892
70.1	2678.66	2690.61	2662.89	-6.17903
70.2	2681.4	2693.22	2666.62	-6.26324
70.3	2684.18	2695.84	2670.3	-6.33801
70.4	2686.99	2698.48	2673.95	-6.22155
70.5	2689.84	2701.13	2677.54	-6.35913
70.6	2692.71	2703.81	2681.09	-6.29613
70.7	2695.61	2706.5	2684.59	-6.46168
70.8	2698.54	2709.22	2688.05	-6.39632
70.9	2701.49	2711.95	2691.45	-6.40839
71	2704.47	2714.71	2694.81	-6.45022
71.1	2707.46	2717.49	2698.11	-6.44849
71.2	2710.48	2720.29	2701.36	-6.55656
71.3	2713.52	2723.12	2704.56	-6.7001
71.4	2716.57	2725.98	2707.71	-6.50285
71.5	2719.63	2728.86	2710.8	-6.52887
71.6	2722.72	2731.76	2713.83	-6.61483
71.7	2725.81	2734.7	2716.81	-6.55025
71.8	2728.91	2737.66	2719.72	-6.61309
71.9	2732.02	2740.65	2722.58	-6.61257
72	2735.14	2743.67	2725.38	-6.62103
72.1	2738.26	2746.72	2728.12	-6.55571
72.2	2741.39	2749.8	2730.81	-6.58563
72.3	2744.53	2752.9	2733.45	-6.55548
72.4	2747.67	2756.04	2736.06	-6.79321
72.5	2750.82	2759.2	2738.63	-6.5314
72.6	2753.99	2762.38	2741.18	-6.49136
72.7	2757.16	2765.58	2743.72	-6.49591
72.8	2760.34	2768.81	2746.25	-6.46682
72.9	2763.53	2772.05	2748.78	-6.56167
73	2766.74	2775.32	2751.32	-6.55307
73.1	2769.96	2778.6	2753.88	-6.62815
73.2	2773.2	2781.89	2756.46	-6.54963
73.3	2776.45	2785.2	2759.07	-6.47527
73.4	2779.71	2788.52	2761.71	-6.53323
73.5	2783	2791.86	2764.41	-6.6008
73.6	2786.3	2795.2	2767.16	-6.63619
73.7	2789.62	2798.56	2769.97	-6.62904
73.8	2792.95	2801.92	2772.86	-6.64087
73.9	2796.31	2805.28	2775.82	-6.79635
74	2799.69	2808.65	2778.86	-6.77168
74.129	2804.08	2813.01	2782.93	-6.80658
74.257	2808.47	2817.33	2787.11	-6.83757
74.386	2812.92	2821.69	2791.47	-6.83605
74.514	2817.36	2826.03	2795.94	-6.78613
74.643	2821.86	2830.4	2800.58	-6.75902
74.771	2826.34	2834.74	2805.33	-6.88395
74.9	2830.87	2839.11	2810.24	-6.89639
75	2834.38	2842.5	2814.14	-6.86314
75.129	2838.93	2846.88	2819.28	-6.78614
75.257	2843.44	2851.22	2824.51	-6.78671
75.386	2847.98	2855.6	2829.89	-6.83002
75.514	2852.49	2859.94	2835.35	-6.87987
75.643	2857.03	2864.31	2840.96	-6.66155
75.771	2861.52	2868.65	2846.64	-6.7016
75.9	2866.03	2873.02	2852.47	-6.55762
76	2869.51	2876.4	2857.06	-6.53597
76.129	2873.98	2880.77	2863.06	-6.52519
76.257	2878.4	2885.09	2869.06	-6.52174
76.386	2882.83	2889.45	2875.11	-6.49592
76.514	2887.21	2893.77	2881.06	-6.4874
76.643	2891.6	2898.13	2886.96	-6.47425
76.771	2895.94	2902.45	2892.66	-6.48038
76.9	2900.29	2906.81	2898.21	-6.45115
77	2903.65	2910.18	2902.35	-6.42216
77.129	2907.97	2914.54	2907.42	-6.47156
77.257	2912.24	2918.87	2912.12	-6.27556
77.386	2916.53	2923.23	2916.47	-6.4338
77.514	2920.76	2927.57	2920.36	-6.40261
77.643	2925.01	2931.94	2923.79	-6.40642
77.771	2929.22	2936.28	2926.66	-6.40021
77.9	2933.43	2940.67	2928.97	-6.48952
78	2936.69	2944.07	2930.16	-6.47638
78.15	2941.57	2949.18	2930.82	-6.31398
78.3	2946.42	2954.3	2931.1	-6.36969
78.45	2951.25	2959.41	2931.11	-6.30155
78.6	2956.07	2964.52	2931.11	-6.31852
78.75	2960.87	2969.62	2931.11	-6.3587
78.9	2965.65	2974.7	2931.11	-6.33758
79	2968.83	2978.07	2931.11	-6.24638
79.2	2975.17	2984.79	2931.11	-6.32271
79.3	2978.33	2988.13	2931.19	-6.35318
79.4	2981.49	2991.45	2931.4	-6.43544
79.5	2984.64	2994.75	2931.78	-6.47673
79.6	2987.78	2998.04	2932.47	-6.46059
79.7	2990.92	3001.3	2934.03	-6.62895
79.8	2994.06	3004.54	2936.07	-6.54486
79.9	2997.18	3007.76	2938.65	-6.61633
80	3000.31	3010.95	2941.81	-6.49467
