# Supplementary material for: Invasions of European Tribes During Severe Cold Winters of the Past Three Millennia
Source: Research Square preprint supplement (doi:10.21203/rs.3.rs-1463772/v1), 2022-03-28
Supplement: Supplementary file 2 [file d8a106d5331ed60c1731b908.xlsx]

## Sheet: SrCa ad BaCa
ZL01
Depth (mm)	Age (yr BP 1950)	Sr/Ca	Ba/Ca
0	6	0.145526	372.508
0.4	22.8963	0.143996	359.995
0.6	31.3445	0.144802	357.59
0.8	39.7926	0.146591	357.805
1	48.2408	0.143961	356.067
1.1	52.4649	0.148522	366.286
1.2	56.6889	0.149111	359.947
1.3	60.913	0.145399	356.544
1.4	65.1371	0.148367	363.109
1.5	69.3612	0.144926	356.574
1.6	73.5853	0.149461	365.798
1.7	77.8093	0.154945	385.251
1.8	82.0334	0.158104	384.188
1.9	86.2575	0.159936	403.119
2	90.4816	0.149932	368.621
2.1	94.7056	0.161782	400.252
2.2	98.9297	0.155022	383.609
2.3	103.154	0.16465	416.237
2.4	107.378	0.16211	408.058
2.5	111.602	0.162548	409.771
2.6	115.826	0.166276	410.848
2.7	120.05	0.160054	397.069
2.8	124.274	0.162717	401.407
2.9	128.498	0.163985	405.887
3	132.722	0.163131	406.901
3.1	134.956	0.165359	398.739
3.2	137.19	0.160246	385.049
3.3	139.423	0.161635	392.462
3.4	141.657	0.158186	374.857
3.5	143.891	0.151603	356.459
3.6	146.125	0.151091	358.58
3.7	148.358	0.164673	397.347
3.8	150.592	0.157212	374.018
3.9	152.826	0.154251	366.437
4	155.059	0.155129	366.691
4.1	157.293	0.155075	370.712
4.2	159.527	0.155355	369.73
4.3	161.76	0.159868	379.084
4.4	163.994	0.163423	381.692
4.5	166.228	0.165157	390.544
4.6	168.462	0.16573	390.994
4.7	170.695	0.164352	383.483
4.8	172.929	0.163976	378.906
4.9	175.163	0.16711	379.756
5	177.396	0.166208	380.011
6	275.513	0.170323	408.237
6.5	297.322	0.166117	369.341
7	319.131	0.162104	381.38
7.5	340.94	0.168312	387.43
8	362.749	0.159963	395.523
8.5	441.543	0.161801	373.531
9	520.338	0.159795	382.681
9.5	599.133	0.169508	380.652
10	603.472	0.180434	434.061
10.5	607.812	0.17848	402.604
11	612.151	0.174574	405.82
11.5	616.49	0.178856	398.266
12	620.83	0.173274	400.415
12.5	625.169	0.176921	373
13	629.508	0.178466	395.349
13.5	633.847	0.181623	396.29
14	638.187	0.174814	396.803
14.5	642.526	0.179634	381.275
15	646.865	0.177574	415.336
15.5	667.101	0.182845	403.411
16	687.336	0.178516	421.83
16.5	707.571	0.184302	414.533
17	727.806	0.178779	427.7
17.5	748.041	0.185123	419.092
18	768.276	0.179634	426.872
18.5	788.512	0.185055	424.689
19	808.747	0.180131	422.351
19.5	828.982	0.188157	435.886
20	849.217	0.184553	451.003
20.5	869.452	0.193586	451.37
21	889.687	0.189513	462.252
21.5	907.548	0.188241	433.77
22	925.409	0.18464	438.472
22.5	943.27	0.184511	411.704
23	961.131	0.180316	420.787
23.5	978.991	0.180387	406.045
24	996.852	0.180913	422.18
24.5	1014.71	0.189341	409.018
25	1032.57	0.189886	456.877
25.5	1050.43	0.195075	434.21
26	1068.3	0.191609	457.388
26.5	1086.16	0.197396	447.689
27	1104.02	0.186348	429.526
27.5	1121.88	0.18799	409.928
28	1135.88	0.179966	405.696
28.5	1149.87	0.182444	385.597
29	1163.87	0.184779	423.147
29.5	1177.87	0.188746	426.444
30	1191.87	0.183808	428.342
30.5	1205.87	0.187261	422.833
31	1219.86	0.191273	454.14
31.5	1233.86	0.185655	420.044
32	1247.86	0.189755	435.748
32.5	1261.86	0.18518	408.096
33	1275.86	0.183578	414.454
33.5	1293.98	0.185619	425.551
34	1312.1	0.182299	442.728
34.5	1330.22	0.19147	432.602
35	1348.34	0.180442	427.494
35.5	1366.45	0.18783	422.549
36	1384.57	0.18291	441.362
36.5	1402.69	0.190189	428.552
37	1420.81	0.183433	431.532
37.5	1438.93	0.187406	426.369
38	1457.05	0.18099	429.691
38.5	1475.17	0.181384	405.668
39	1493.29	0.184766	434.955
39.5	1525.55	0.184176	421.045
40	1557.81	0.181437	417.133
40.5	1590.07	0.186789	407.26
41	1622.33	0.183401	415.29
42	1686.85	0.176357	394.604
42.5	1719.11	0.179996	390.59
43	1751.37	0.174898	402.724
43.5	1783.63	0.179584	405.923
44	1815.89	0.181585	409.531
44.5	1824.63	0.180795	392.318
45	1833.37	0.185356	421.009
45.5	1842.1	0.181424	398.028
46	1850.84	0.178637	395.743
46.5	1859.58	0.178194	390.155
47	1868.32	0.187114	422.167
47.5	1877.05	0.187076	408.497
48	1885.79	0.18912	417.42
48.5	1896.27	0.191415	414.878
49	1903.26	0.18839	426.01
49.5	1912	0.193291	433.282
50	1932.15	0.191021	451.855
50.5	1952.31	0.1923	441.491
51	1970.44	0.190237	446.861
51.5	1988.58	0.192123	425.511
52	2012.76	0.1882	429.055
52.5	2032.92	0.188906	430.943
53	2053.07	0.180663	414.364
53.5	2073.22	0.186402	428.218
54	2093.38	0.186423	435.445
54.5	2113.53	0.192098	439.666
55	2133.68	0.184419	421.504
55.5	2153.83	0.189902	435.163
56	2179.02	0.187882	427.433
56.5	2204.2	0.197967	461.955
57	2229.39	0.17877	399.107
57.5	2254.57	0.18542	405.79
58	2279.75	0.181838	407.468
58.5	2304.94	0.191459	428.586
59	2330.12	0.187391	414.216
59.5	2355.31	0.195971	432.638
60	2380.49	0.193579	431.255
60.5	2405.67	0.202391	449.818
61	2430.86	0.187361	430.663
61.5	2446.63	0.189299	412.582
62	2462.41	0.189787	436.601
62.5	2478.18	0.196262	452.663
63	2493.96	0.186537	412.9
63.5	2503.43	0.195061	438.578
64	2525.51	0.192818	436.023
64.5	2541.29	0.176701	382.131
65	2557.06	0.186196	398.419
65.5	2572.84	0.187274	396.324
66	2588.61	0.19125	422.536
66.5	2600.27	0.1851	406.323
67	2611.93	0.19193	430.271
67.5	2623.59	0.195399	428.555
68	2635.25	0.194614	446.777
68.5	2646.91	0.194561	453.509
69	2658.56	0.197016	468.189
69.5	2670.22	0.192418	452.774
70	2681.88	0.203575	469.372
70.5	2693.54	0.185385	416.762
71	2705.2	0.196411	449.933
71.5	2716.86	0.190488	452.15
72	2734.26	0.193069	465.777
72.5	2751.67	0.19499	440.378
73	2769.08	0.189679	431.444
73.5	2786.49	0.187028	424.53
74	2803.89	0.193841	448.225
74.5	2821.3	0.193835	435.608
75	2838.71	0.191138	446.961
75.5	2856.12	0.196595	441.163
76	2873.53	0.195671	452.66
76.5	2890.93	0.190808	438.013
77	2908.34	0.192175	456.444
77.5	2924.53	0.192267	444.685
78	2940.71	0.193107	457.164
78.5	2956.9	0.186811	435.962
79	2973.09	0.186828	421.274
79.5	2989.27	0.190888	419.953
80	3005.46	0.187459	416.168
